# Supplementary material
Source: publisher figshare collection journal article supplement (https://karger.figshare.com/articles/dataset/_/5241736)
Supplement: Supplementary file 1 [file 1]

## Erratum

---

In the article by Jason L. Vassy et al., entitled ‘A one-page summary report of genome sequencing for the healthy adult’ [Public Health Genomics 2015;18:123–129, DOI: 10.1159/000370102], the name of the second author is wrong. The correct name is Heather M. McLaughlin.
